# Supplementary material for: Microbiome Compositions From Infertile Couples Seeking In Vitro Fertilization, Using 16S rRNA Gene Sequencing Methods: Any Correlation to Clinical Outcomes?
Source: PubMed Central journal article supplement (PMC8517523; doi:10.3389/fcimb.2021.709372), 2021-10-01

## Supplementary Figures

Fig.S1

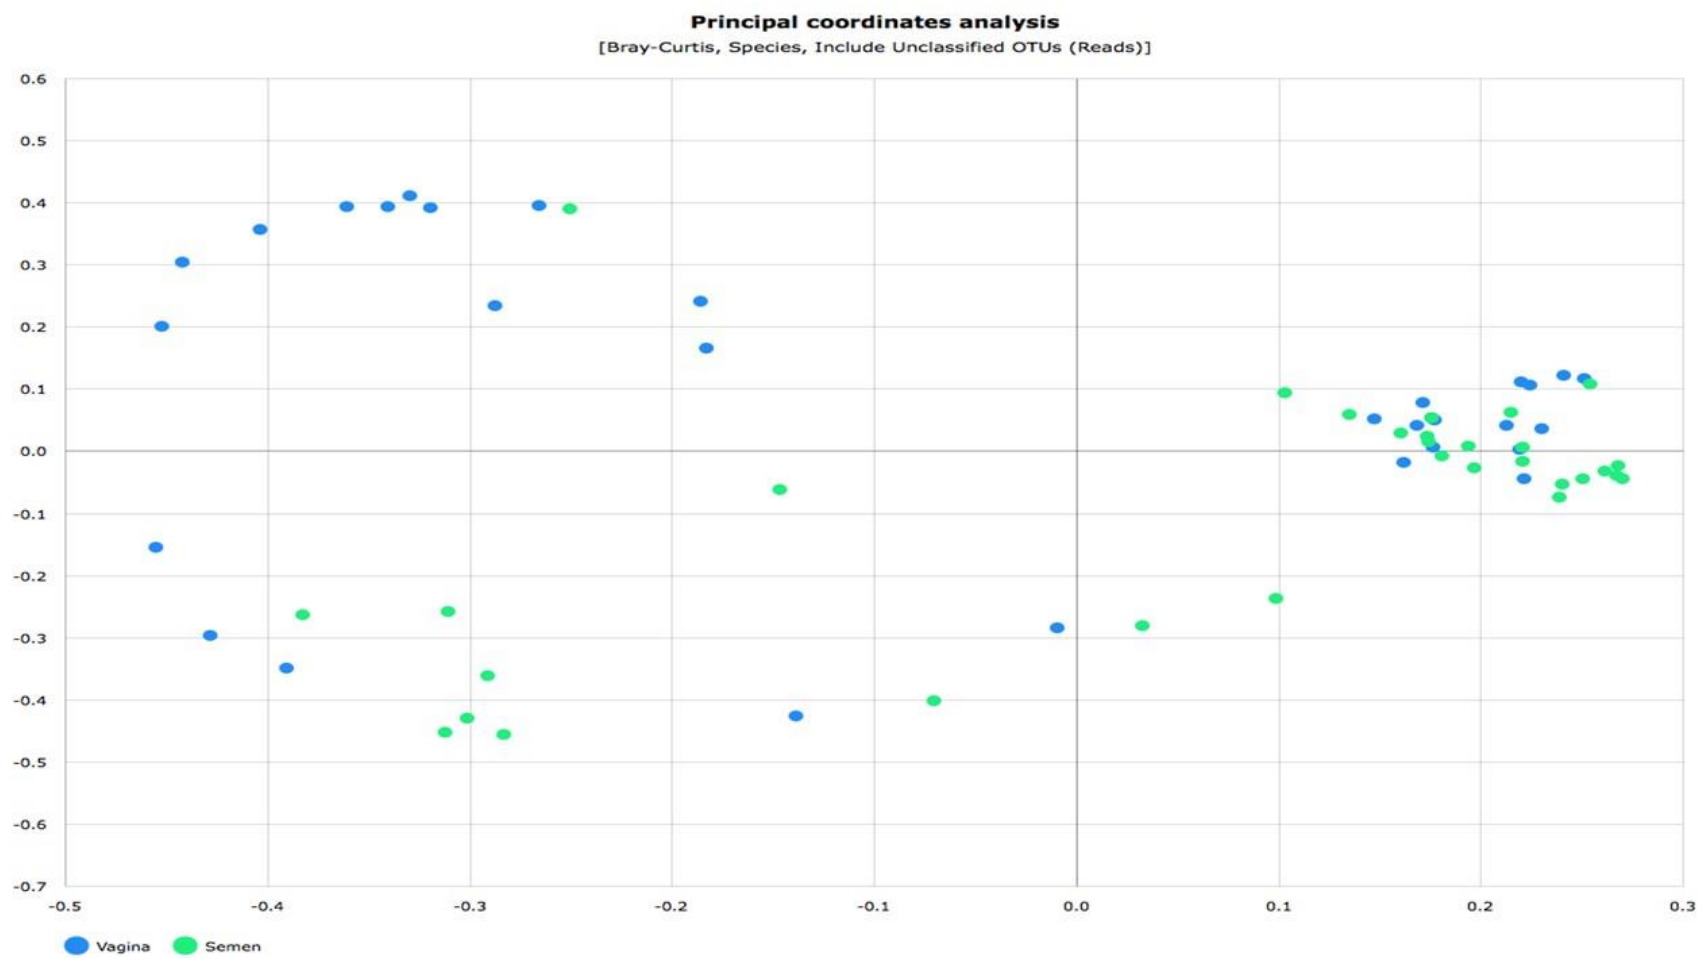

Fig.S2

Semen samples

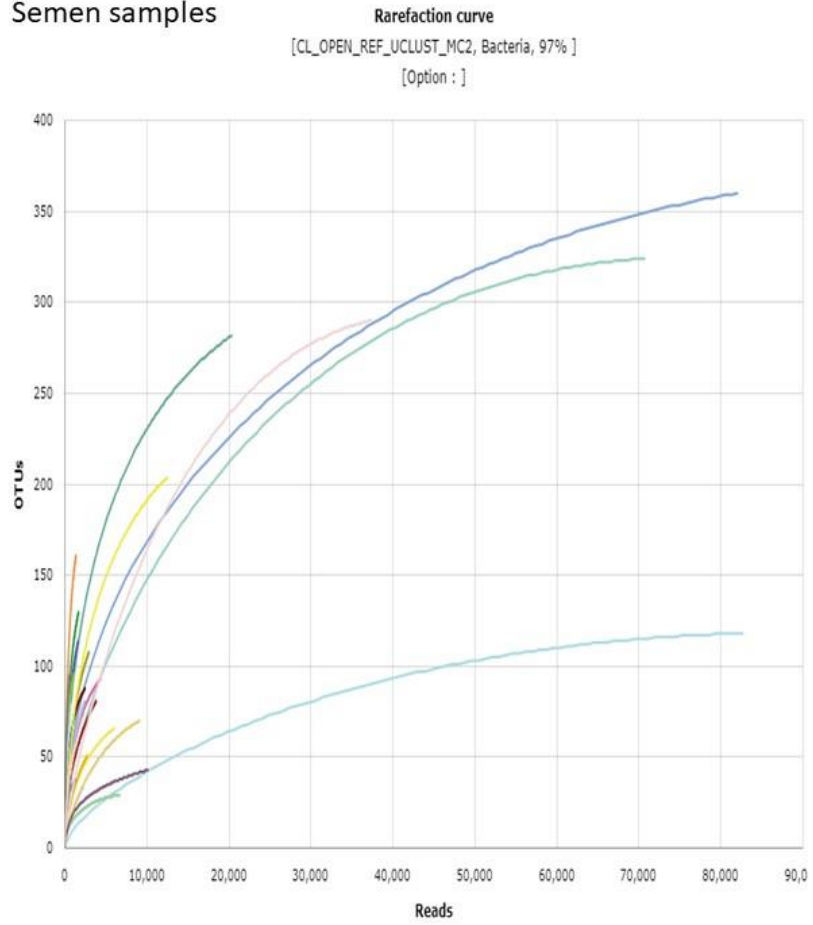

Vagina samples

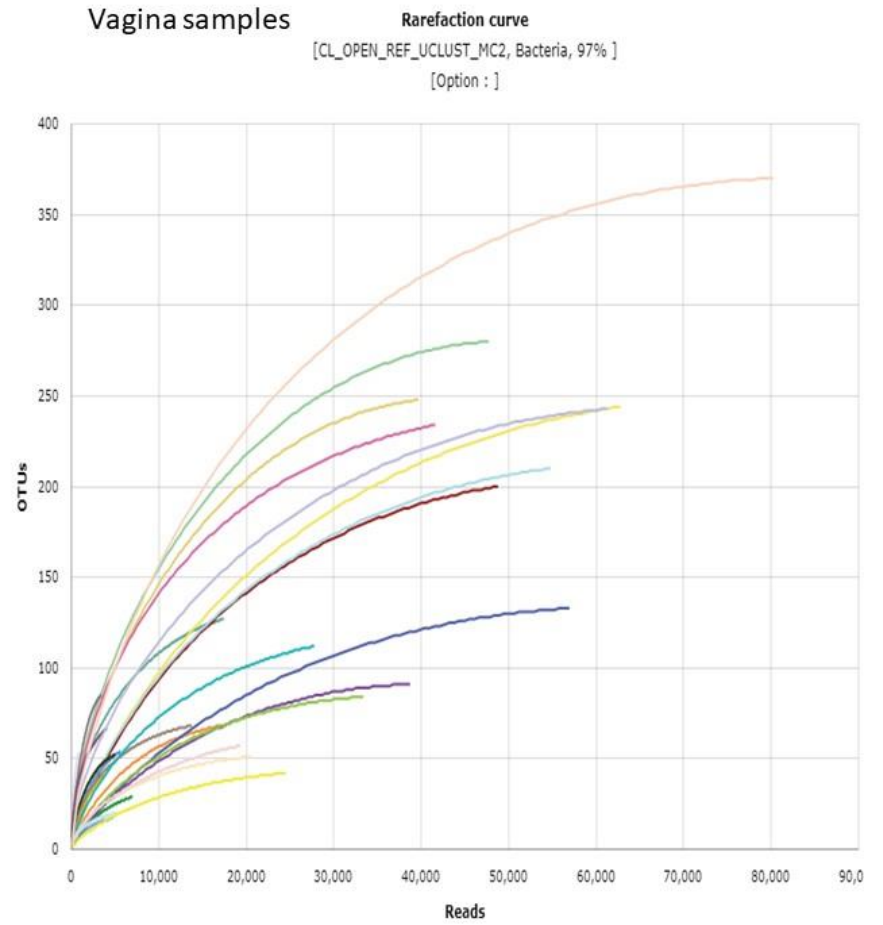

Fig.S3

Genera

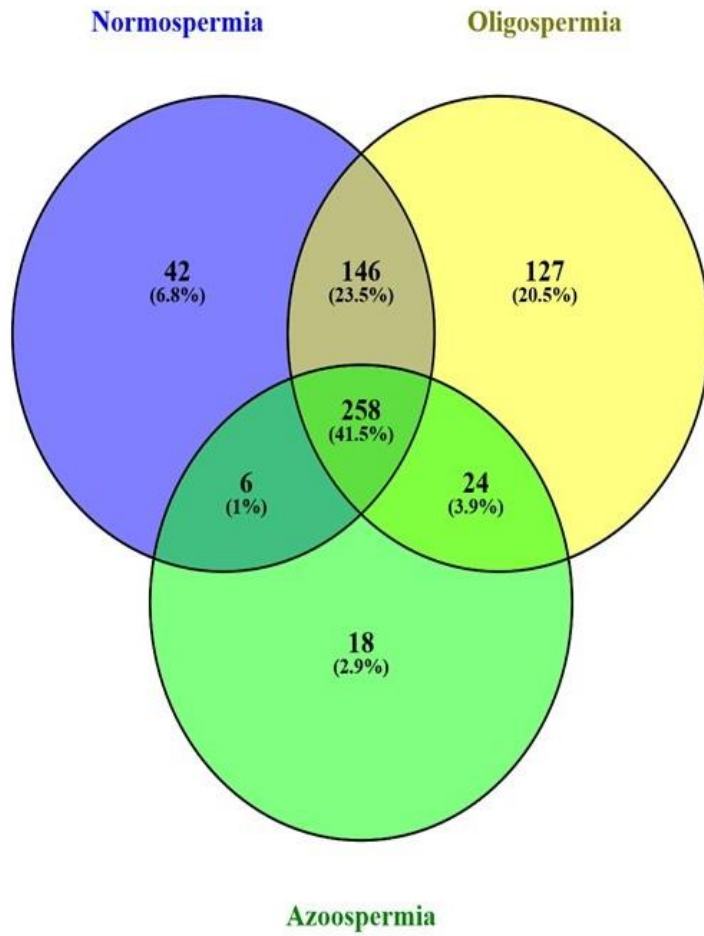

Species

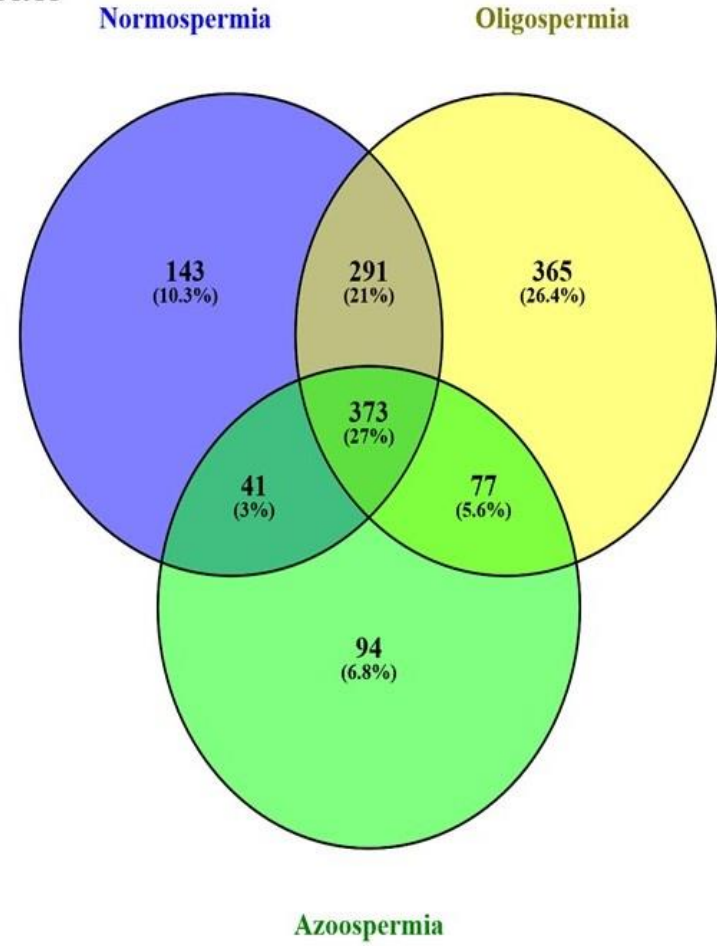



% relative abundance of genera in normospermia couples

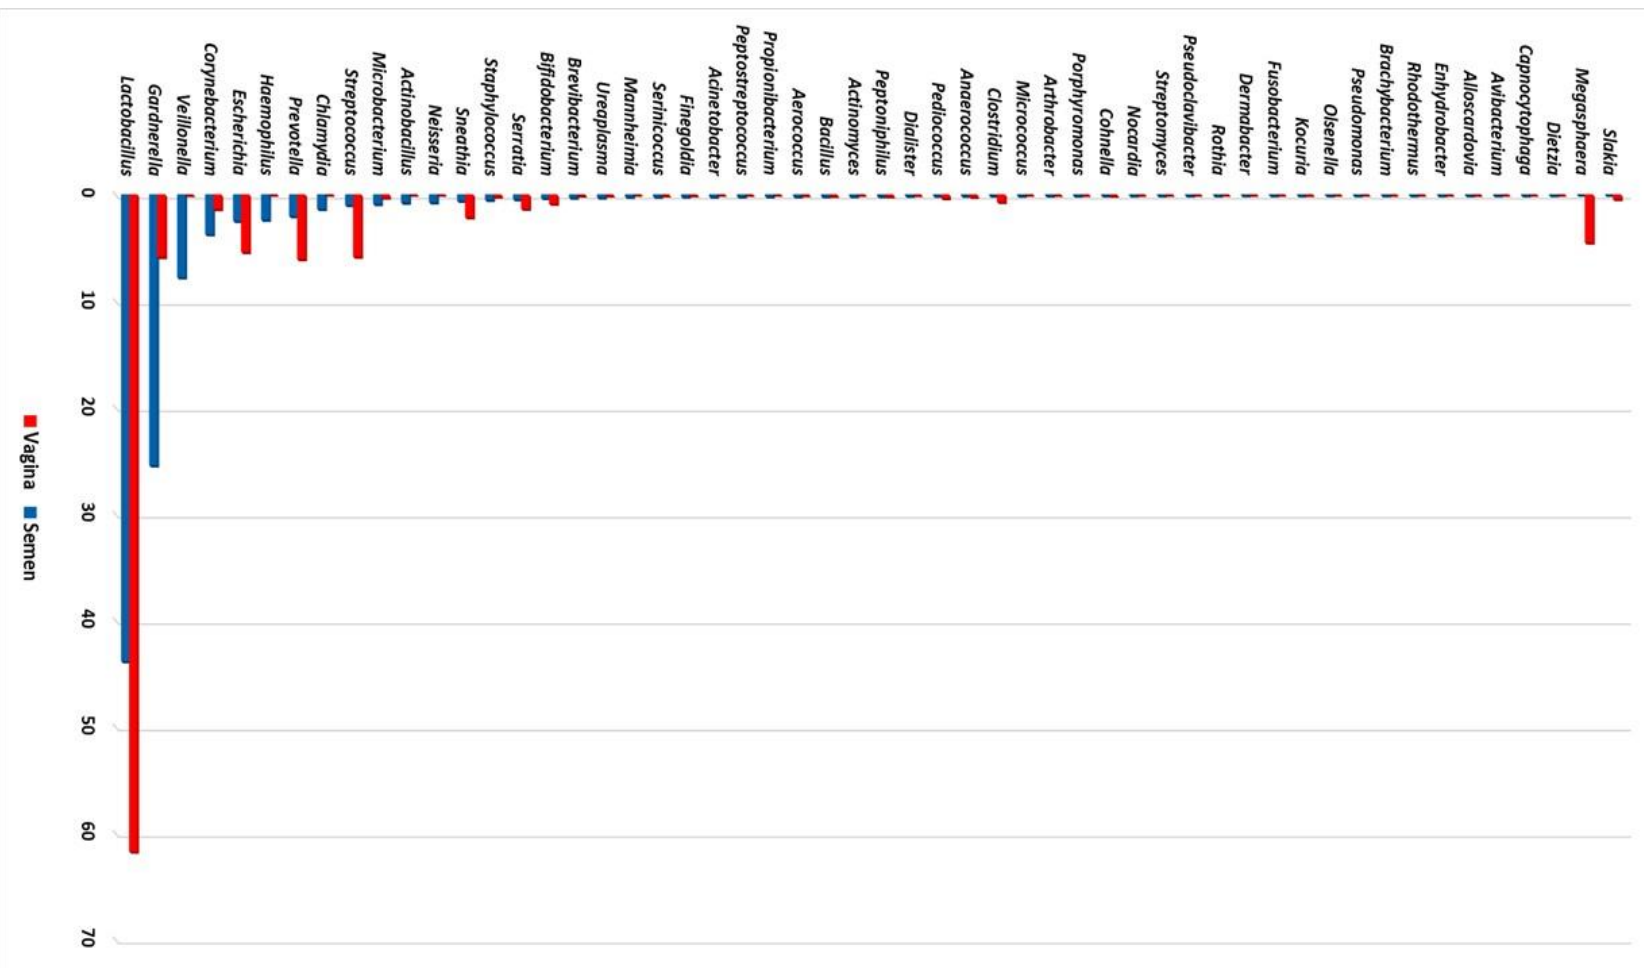

Fig.S5

Fig.S6

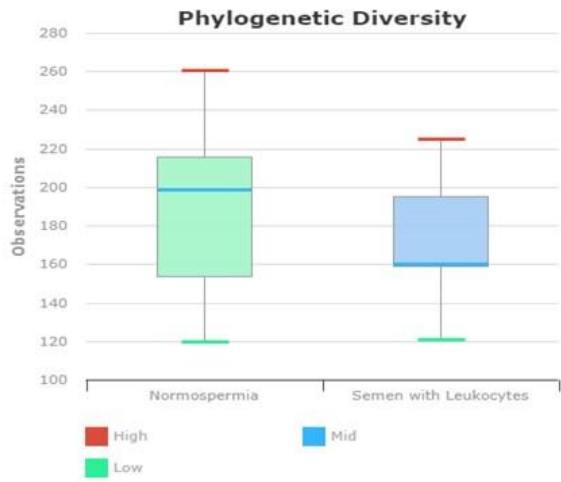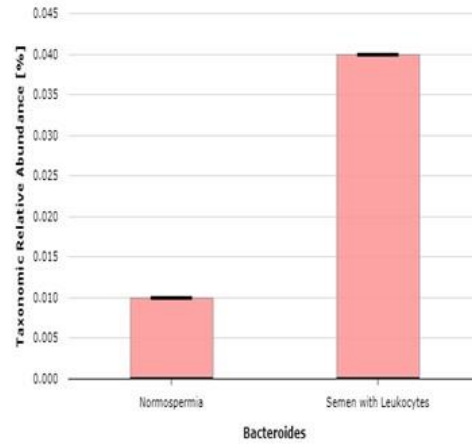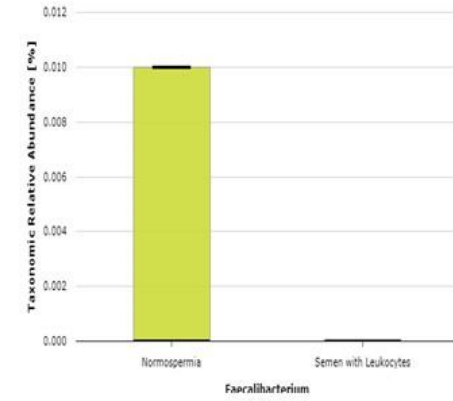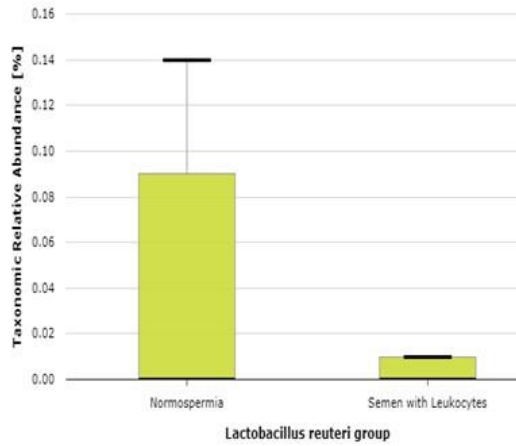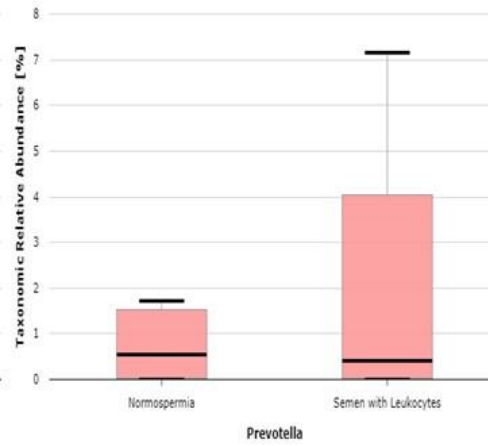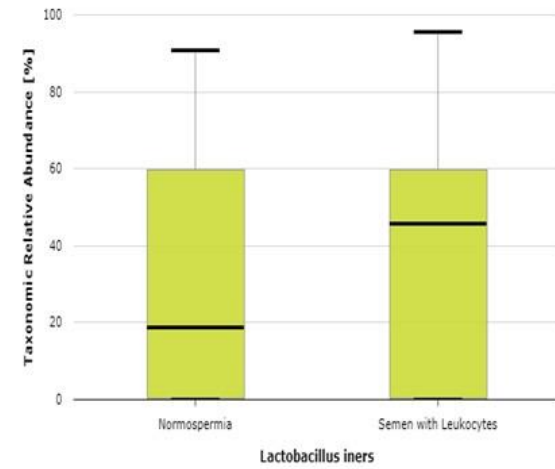

Fig.S7

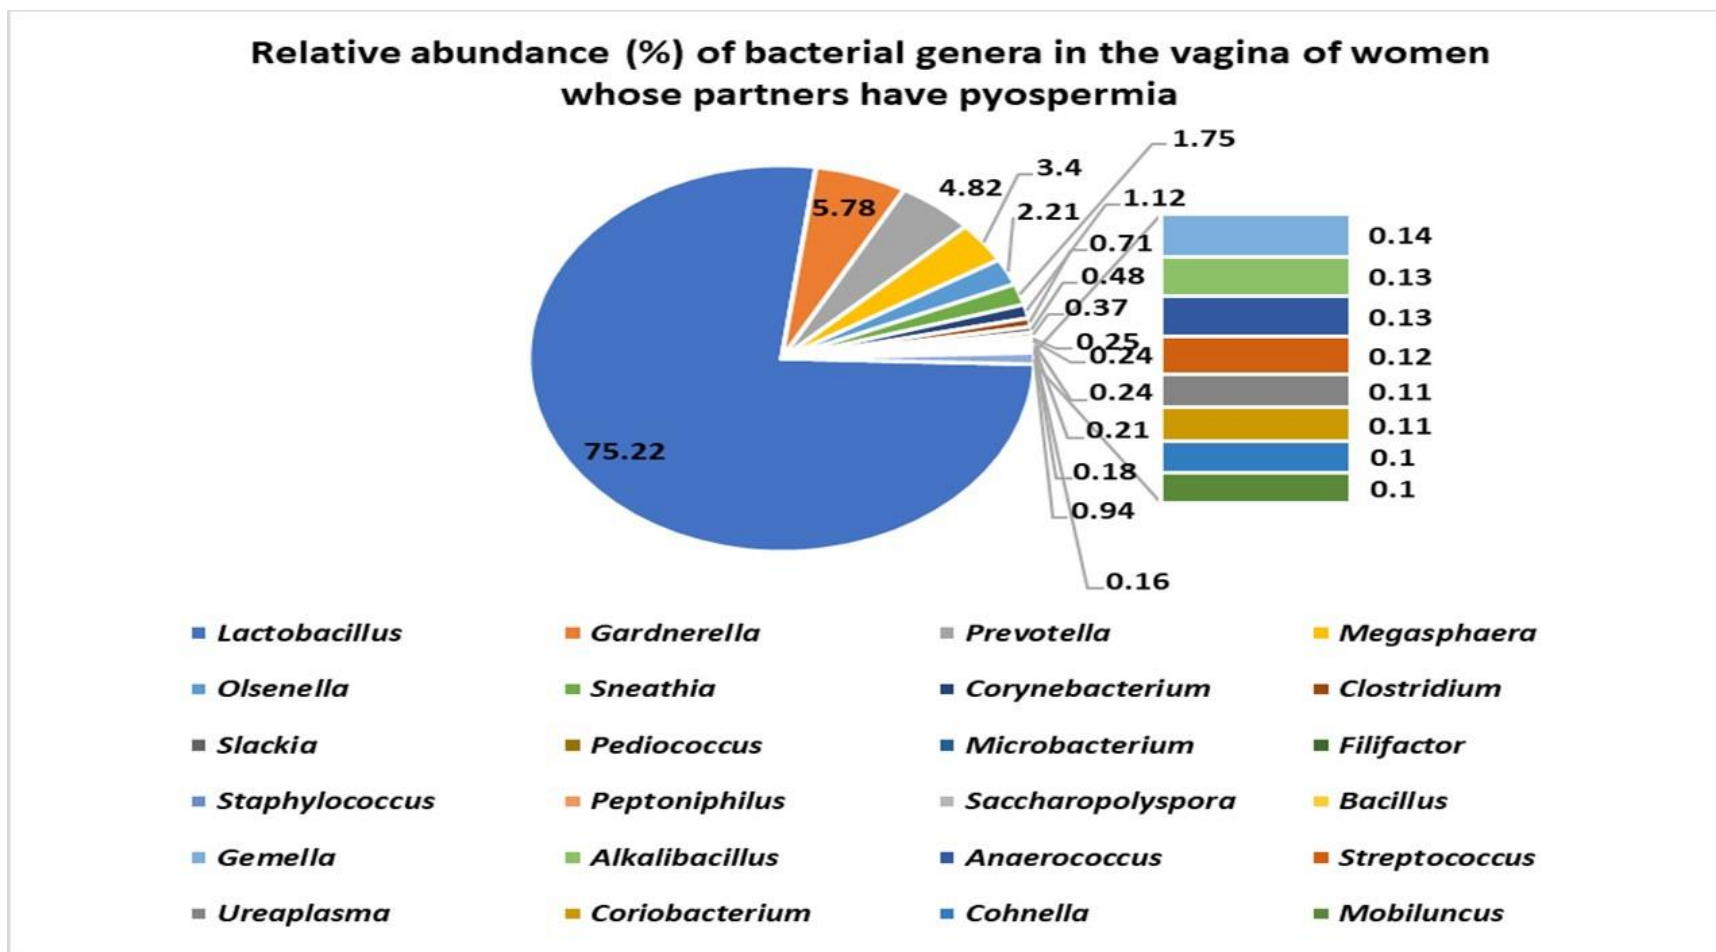

Fig.S8

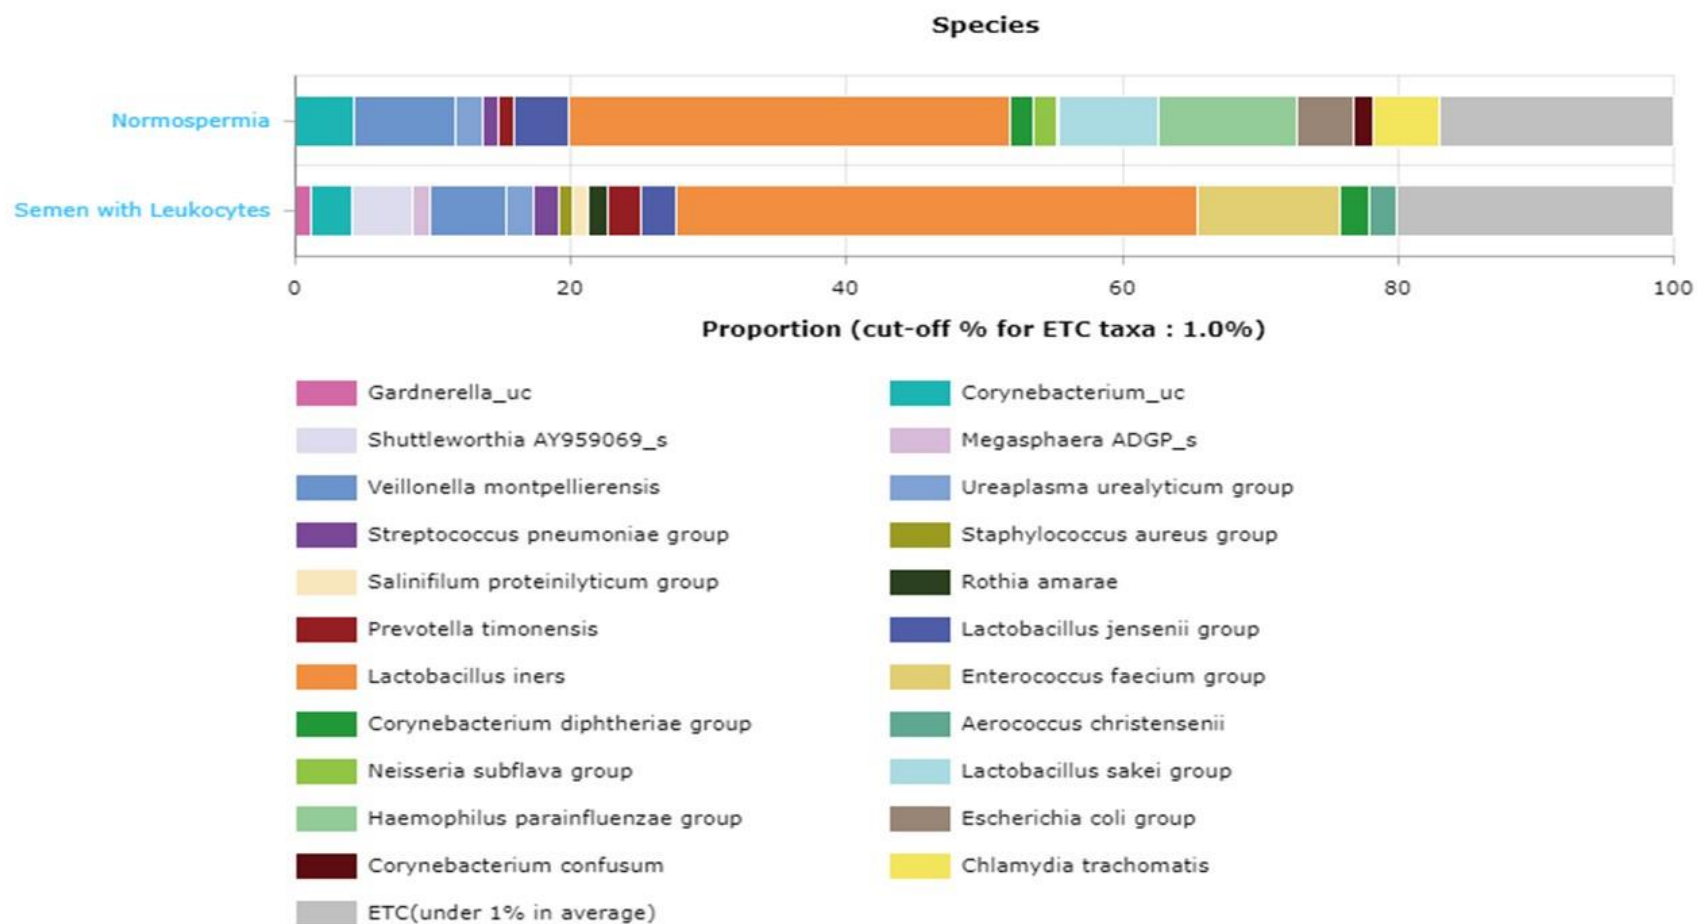



**Fig.S9**

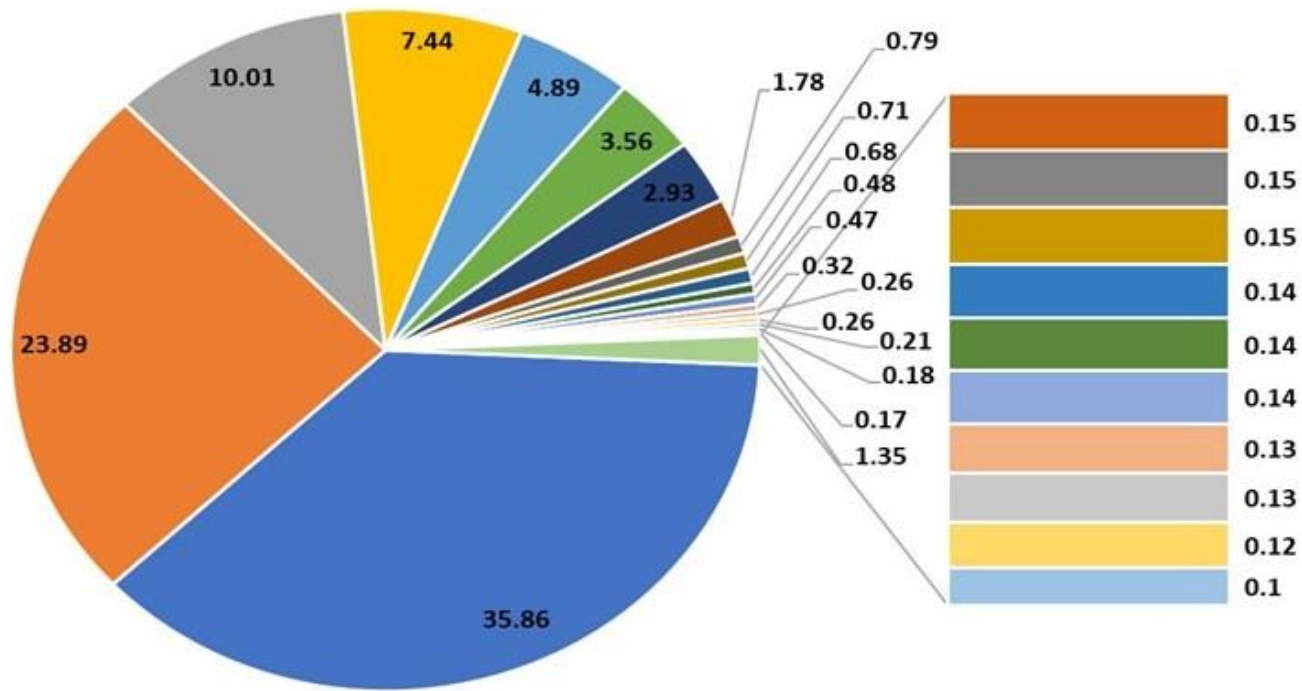

- *Lactobacillus iners*
- *Gardnerella vaginalis*
- *Olsenella uli*
- *Lactobacillus ultunensis*
- *Lactobacillus gallinarum*
- *Megasphaera hominis*
- *Corynebacterium aurimucosum*
- *Coriobacterium glomerans*
- *Lactobacillus intermedius*
- *Lactobacillus gigeriorum*

- *Lactobacillus jensenii*
- *Lactobacillus taiwanensis*
- *Prevotella timonensis*
- *Lactobacillus crispatus*
- *Filifactor villosus*
- *Pediococcus argentanicus*
- *Lactobacillus faeni*
- *Lactobacillus intestinalis*
- *Prevotella buccalis*
- *Ureaplasma parvum*

- *Lactobacillus acidophilus*
- *Prevotella amnii*
- *Lactobacillus johnsonii*
- *Lactobacillus kitasatonis*
- *Corynebacterium coyleae*
- *Peptoniphilus lacrimalis*
- *Gemella bergeri*
- *Corynebacterium riegelii*
- *Cohnella soli*

Fig.S10

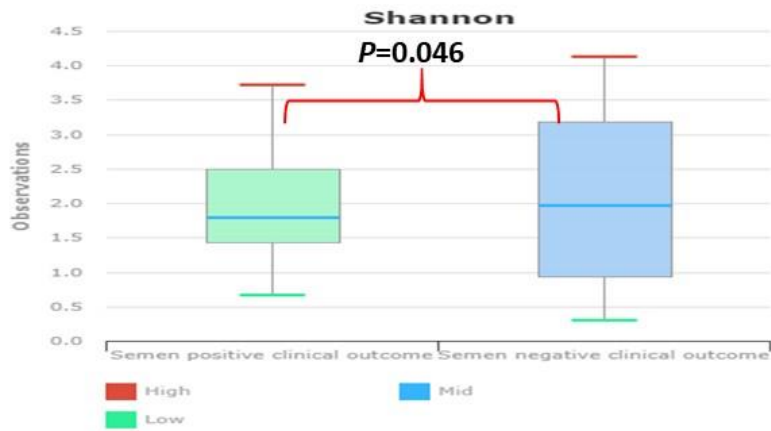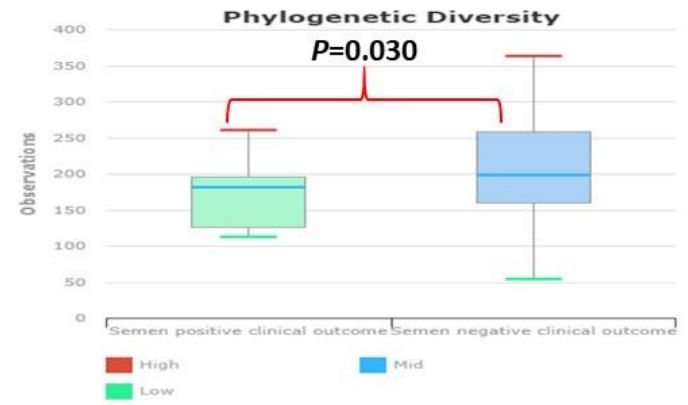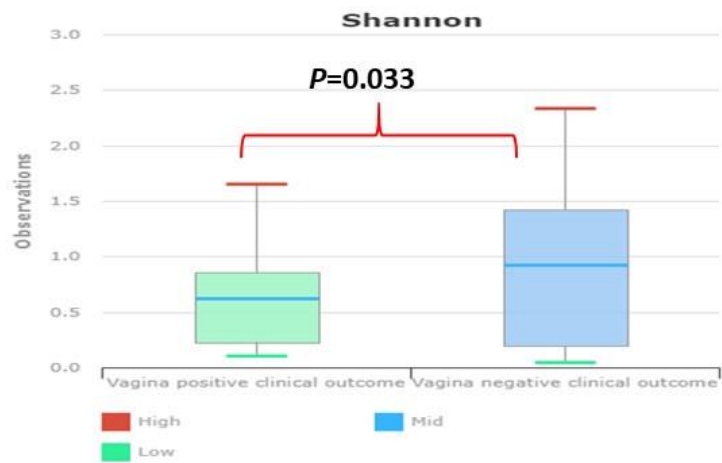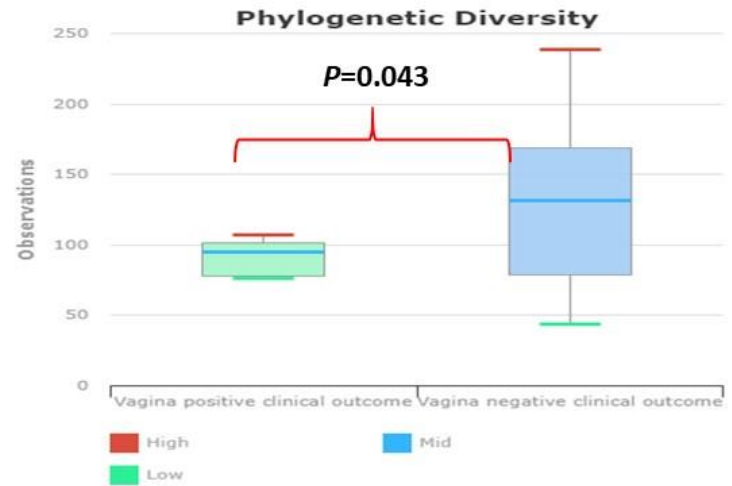

Supplement: DataSheet_1.pdf [file DataSheet_1.pdf]
